# Supplementary material for: Single-Dose Pharmacokinetics of Milvexian in Participants with Normal Renal Function and Participants with Moderate or Severe Renal Impairment
Source: PubMed Central journal article supplement — Clin Pharmacokinet. 2022 Jul 30;61(10):1405–16. doi: 10.1007/s40262-022-01150-1 (PMC9553801; doi:10.1007/s40262-022-01150-1), 2022-07-30
Supplement: 40262_2022_1150_MOESM1_ESM.pdf [file 40262_2022_1150_MOESM1_ESM.pdf]

## Supplementary Information

### *Clinical Pharmacokinetics*

#### Single-dose Pharmacokinetics of Milvexian in Participants with Normal Renal Function and Participants with Moderate or Severe Renal Impairment

Vidya Perera,<sup>1</sup> Grigor Abelian, Danshi Li, Zhaoqing Wang, Liping Zhang, Susan Lubin, Akintunde Bello, Bindu Murthy

<sup>1</sup> **Corresponding author:** Bristol Myers Squibb, 3401 Princeton Pike, Lawrenceville, NJ 08648, USA. E-mail: [Vidya.Perera@bms.com](mailto:Vidya.Perera@bms.com)

#### Online Resource 1. Pharmacokinetic (PK) sampling schedule

| Study day | Time (relative to milvexian dose), hour:min | PK blood sample for plasma conc. | PK protein binding blood sample | PK urine sample | PD blood sample |
|-----------|---------------------------------------------|----------------------------------|---------------------------------|-----------------|-----------------|
| 1         | 00:00                                       | X <sup>a</sup>                   |                                 | X <sup>a</sup>  | X <sup>a</sup>  |
| 1         | 00:30                                       | X                                |                                 | X (0-8 h)       | X               |
| 1         | 1:00                                        | X                                |                                 |                 |                 |
| 1         | 1:30                                        | X                                |                                 |                 |                 |
| 1         | 2:00                                        | X                                |                                 |                 |                 |
| 1         | 3:00                                        | X                                |                                 |                 | X               |
| 1         | 4:00                                        | X                                | X                               |                 | X               |
| 1         | 4:30                                        | X                                |                                 |                 |                 |
| 1         | 5:00                                        | X                                |                                 |                 | X               |
| 1         | 6:00                                        | X                                |                                 |                 | X               |
| 1         | 7:00                                        | X                                |                                 |                 | X               |
| 1         | 8:00                                        | X                                |                                 | X (8-12 h)      | X               |
| 1         | 10:00                                       | X                                |                                 |                 |                 |
| 1         | 12:00                                       | X                                |                                 | X (12-24 h)     | X               |
| 2         | 18:00                                       | X                                |                                 |                 |                 |
| 2         | 24:00                                       | X                                |                                 | X (24-48 h)     | X               |
| 2         | 36:00                                       | X                                |                                 |                 |                 |
| 3         | 40:00                                       | X                                |                                 |                 |                 |
| 3         | 48:00                                       | X                                |                                 | X (48-72 h)     | X               |
| 4         | 72:00                                       | X                                |                                 | X (72-96 h)     | X               |
| 5         | 96:00                                       | X                                |                                 |                 |                 |

<sup>a</sup> Sample obtained prior to milvexian administration.  
*Conc.* concentration, *PD* pharmacodynamics,
